# Supplementary material for: miR‐148a inhibits early relapsed colorectal cancers and the secretion of VEGF by indirectly targeting HIF‐1α under non‐hypoxia/hypoxia conditions
Source: PubMed Central journal article supplement (PMC6484316; doi:10.1111/jcmm.14257), 2019-03-04

# Supplementary Figure 1A

*miR-148a* level after pCDH-*miR-148a* vector transfected into HCT116 and HT29

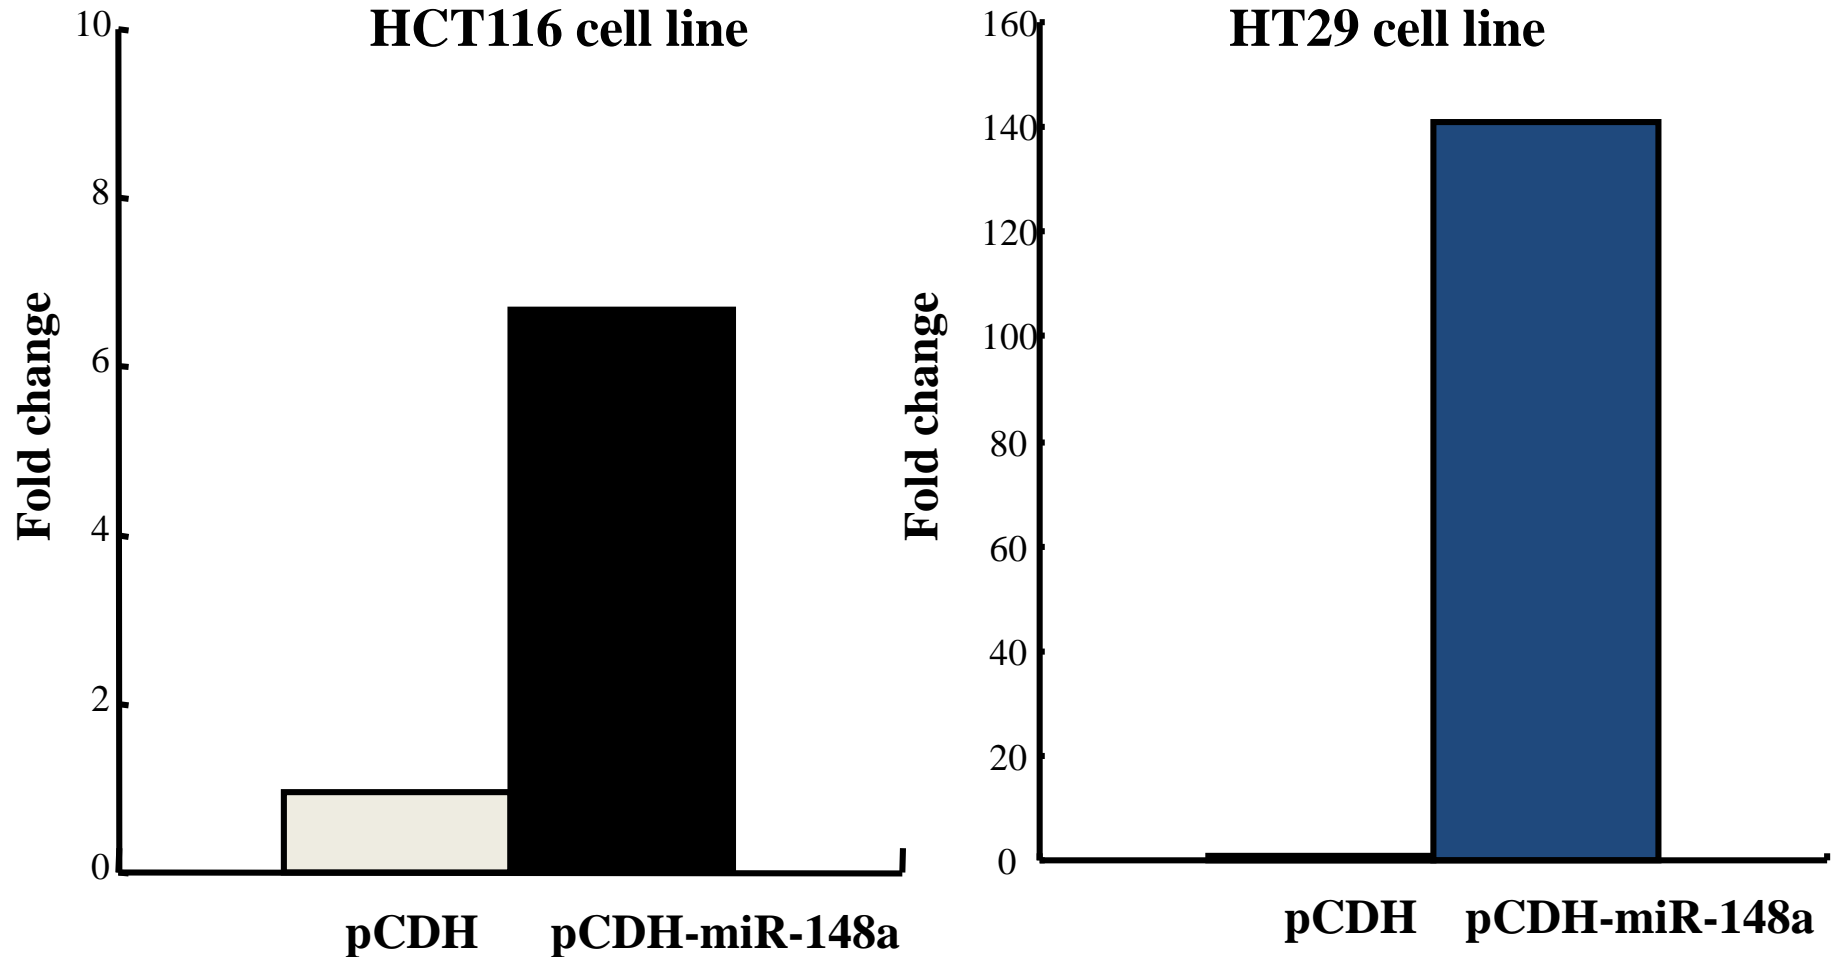

## Supplementary Figure 1B

*miR-148a* level after pCDH-*miR-148a* vector transfected into SW480, SW620, and Caco-2

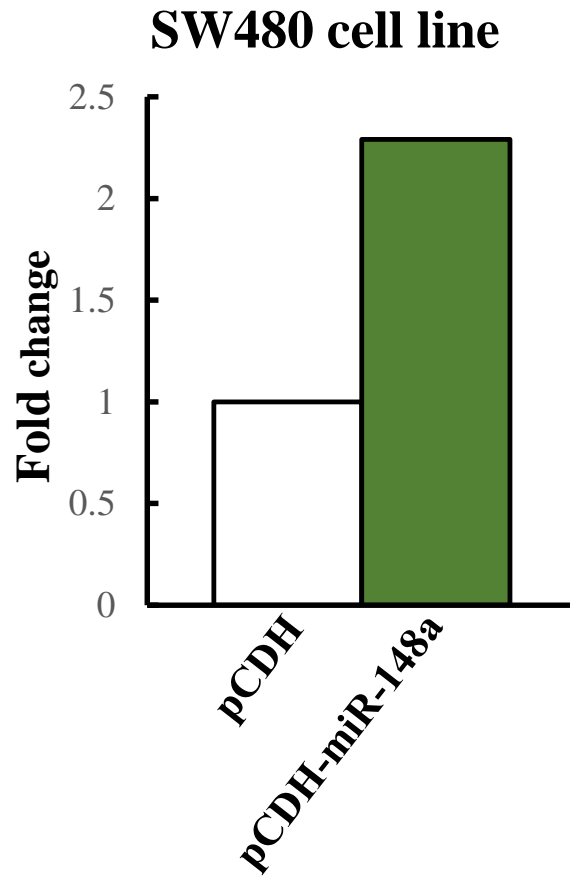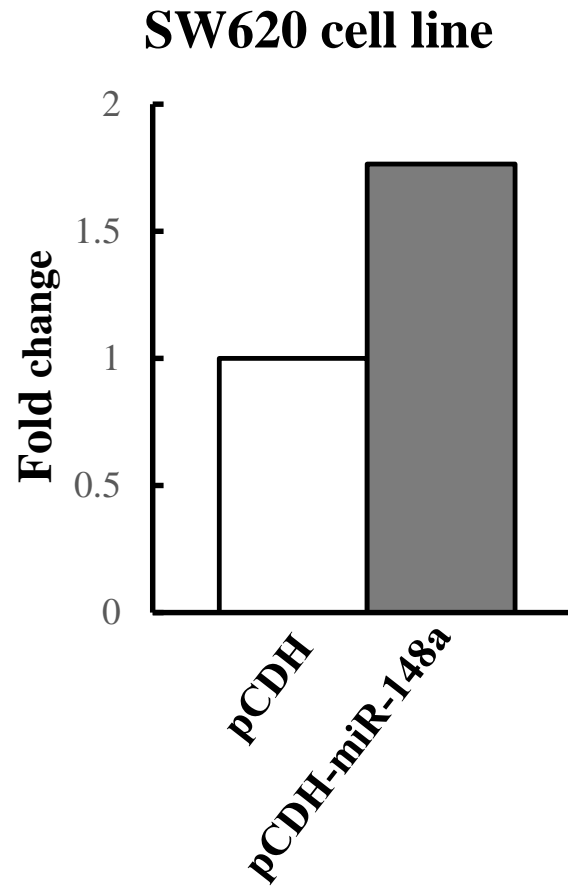

**Caco-2 cell line**

pCDH-*miR-148a* vector transfected into Caco-2 cell line was not successfully performed. Therefore, constant *miR-148a* level in transfected Caco-2 was not determined.

## Supplementary Figure 2

*miR-148a* indirectly inhibits the HIF-1 $\alpha$  by luciferase assay in HCT116 and HT29 cell lines

### Reporter assay (Luciferase assay):

**A**

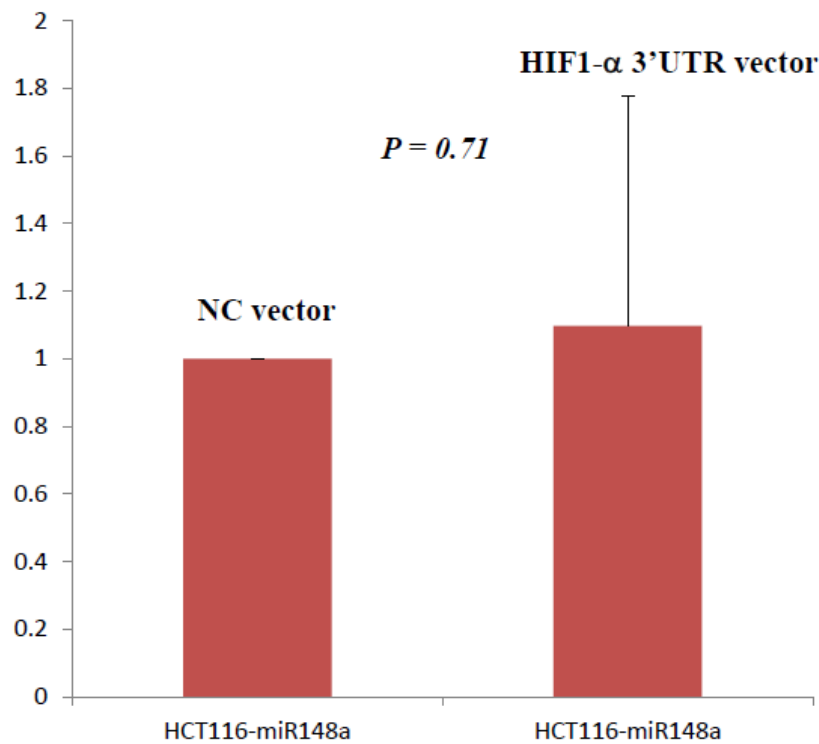

**B**

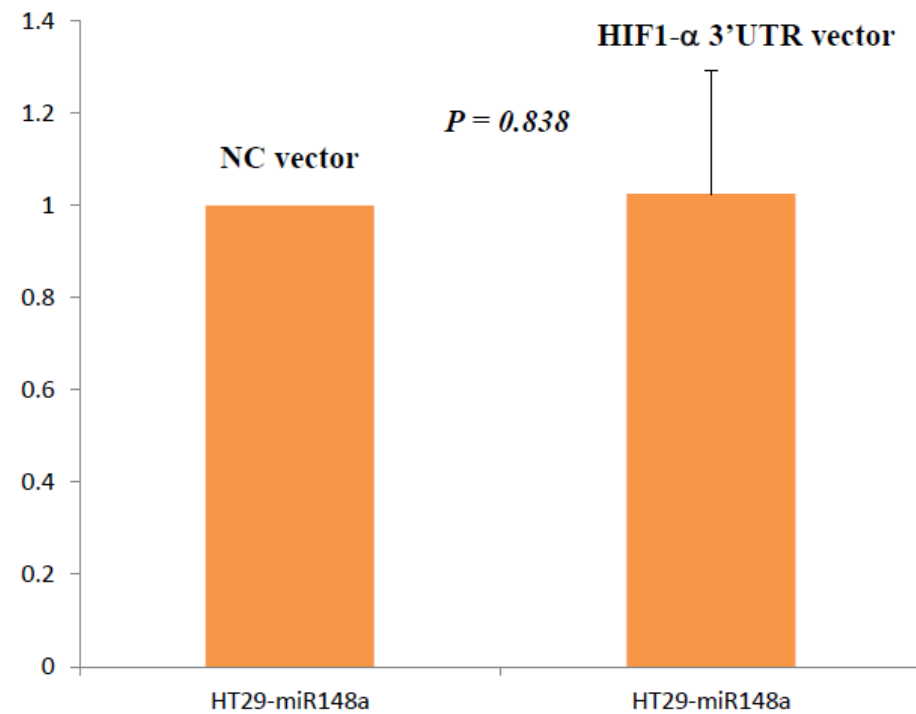

# Supplementary Figure 3

A HCT116 (Full-length blots/gels are presented in Supplementary Figure 4A)

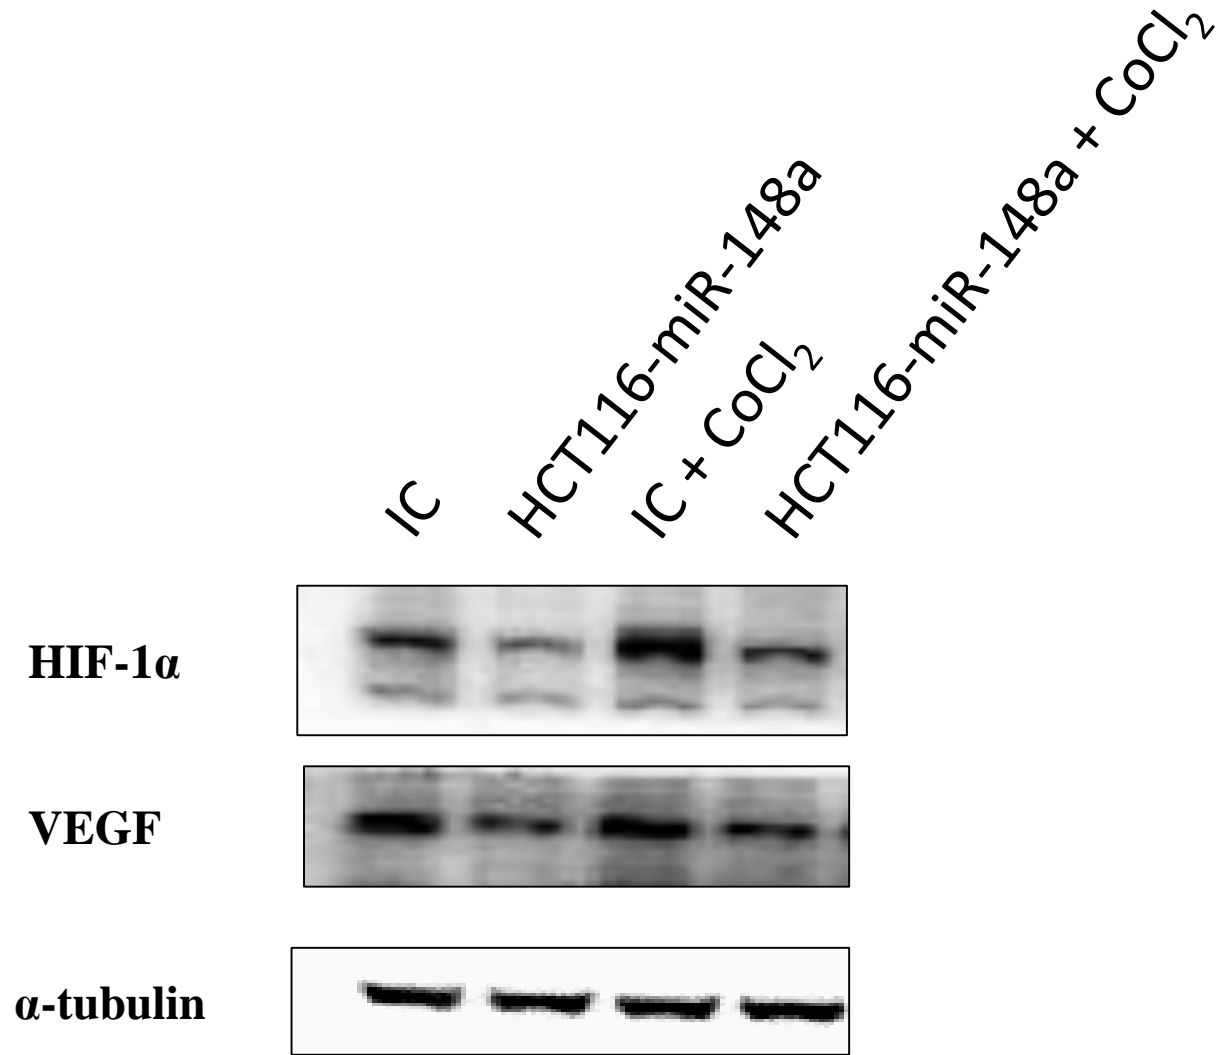

### HCT116 HIF-1 $\alpha$

### HCT116 VEGF

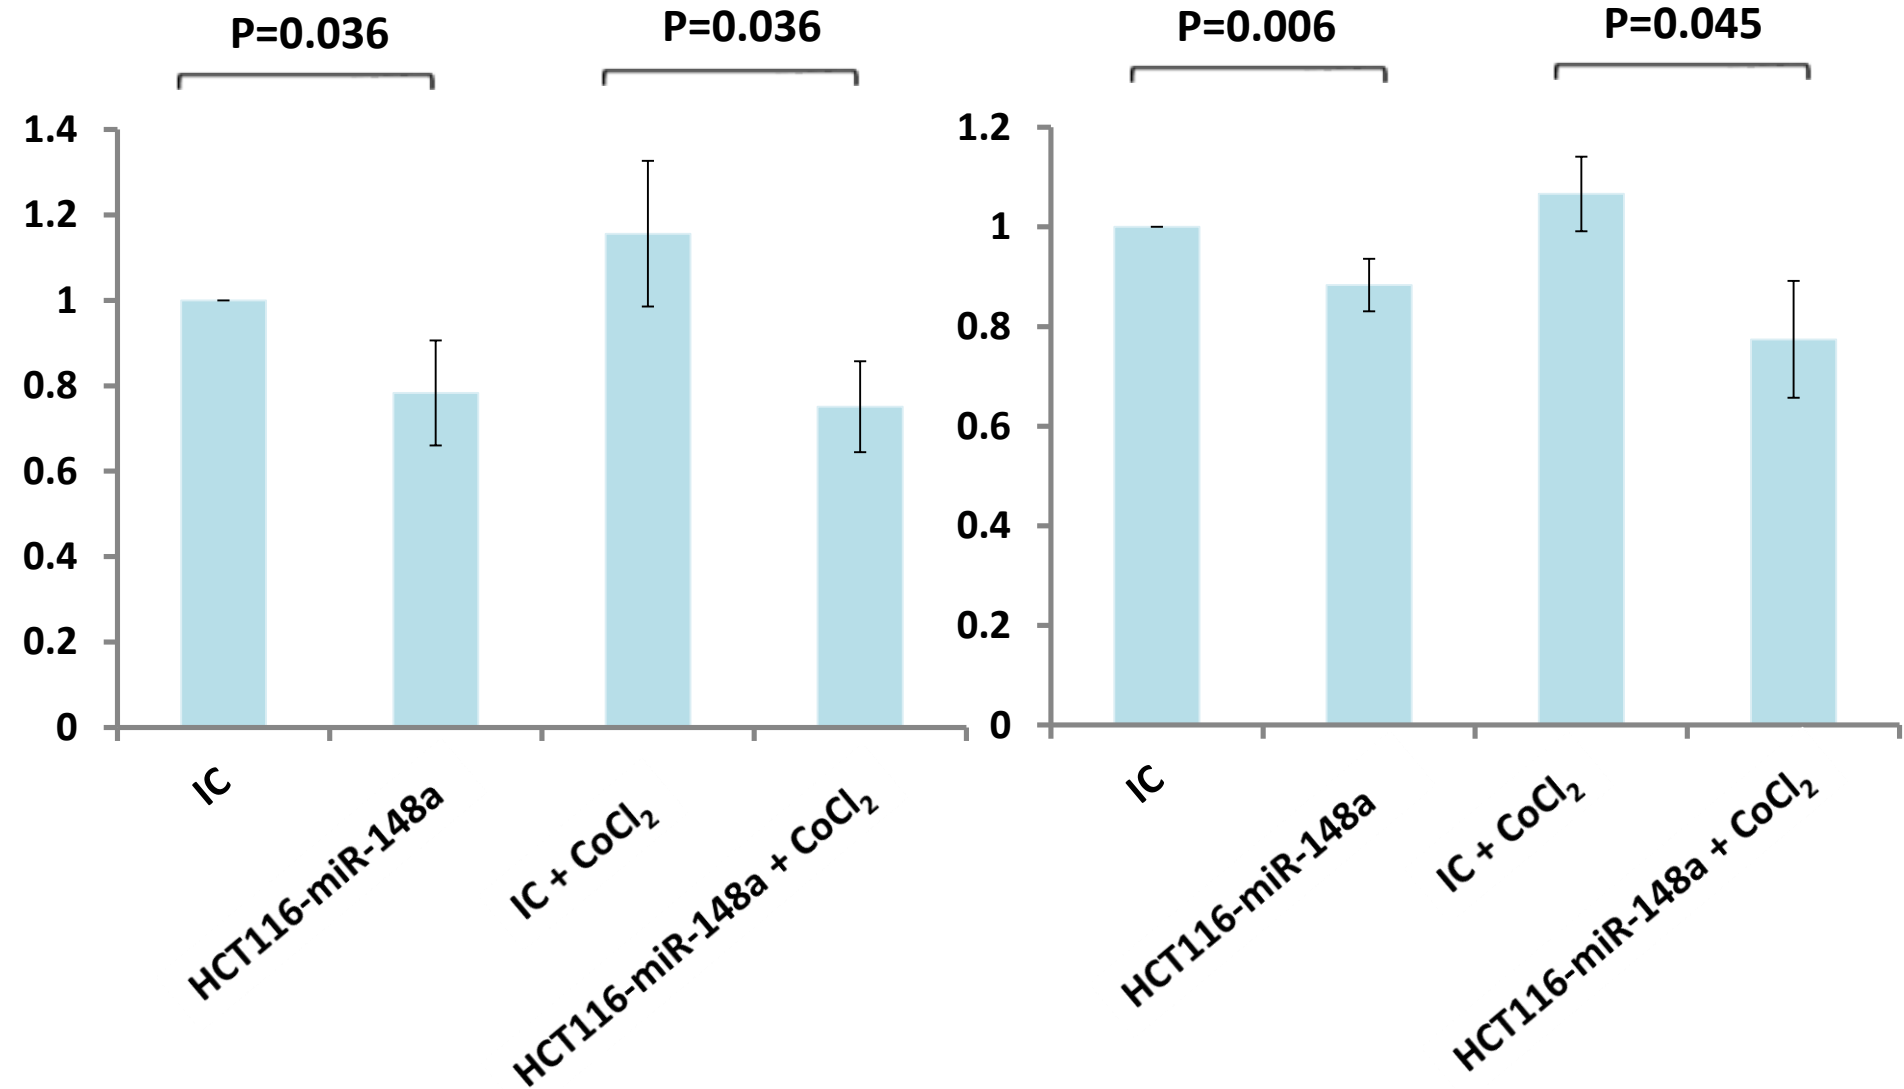

**B HT29 (Full-length blots/gels are presented in Supplementary Figure 4B)**

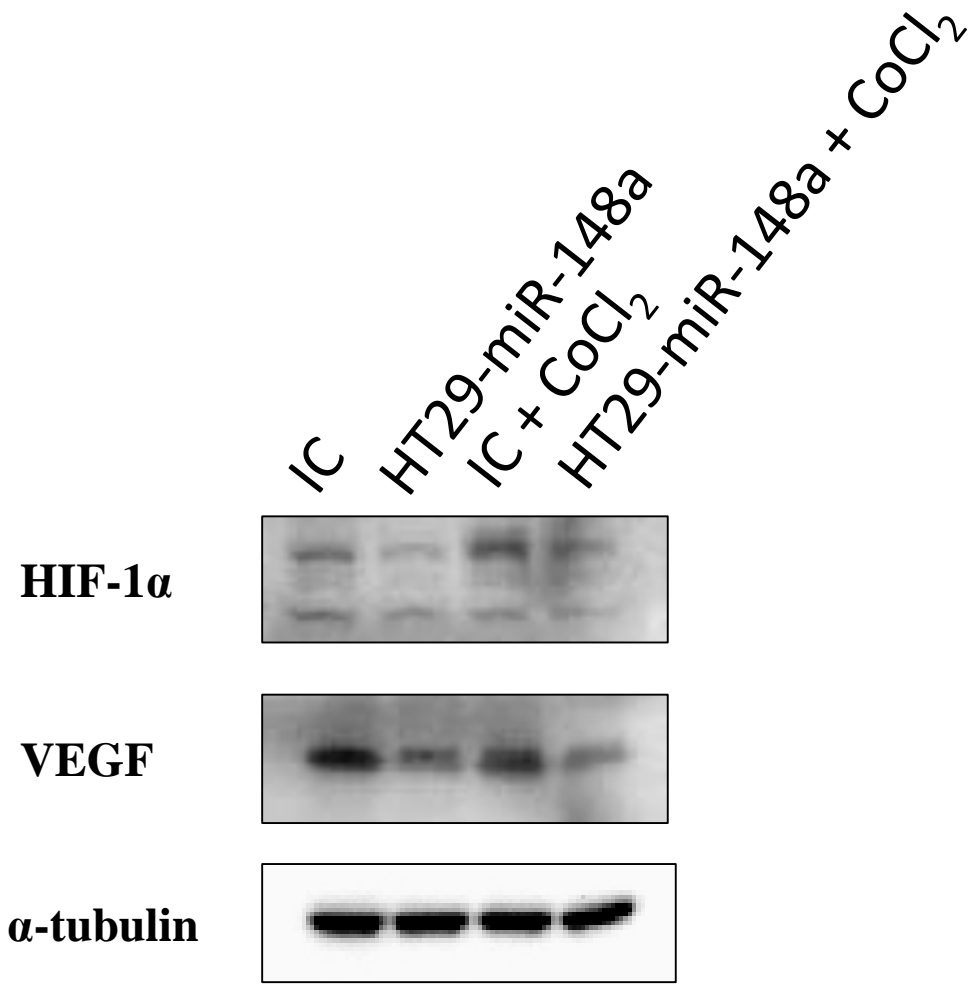

### HT29 HIF-1 $\alpha$

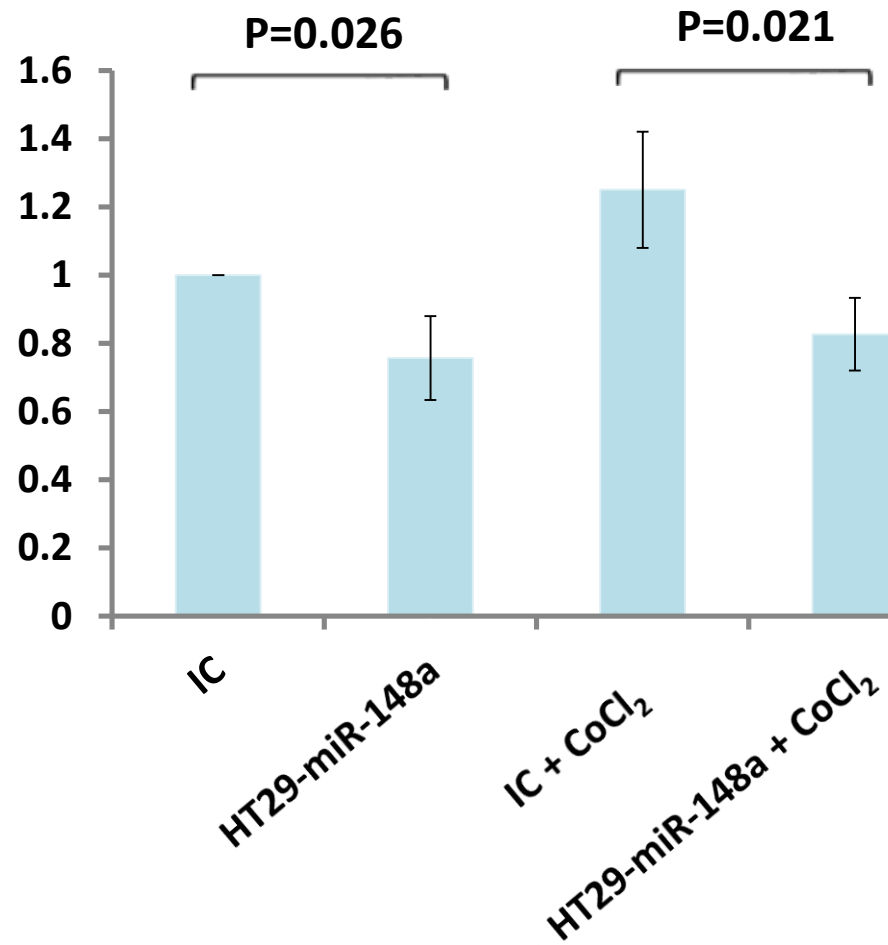

### HT29 VEGF

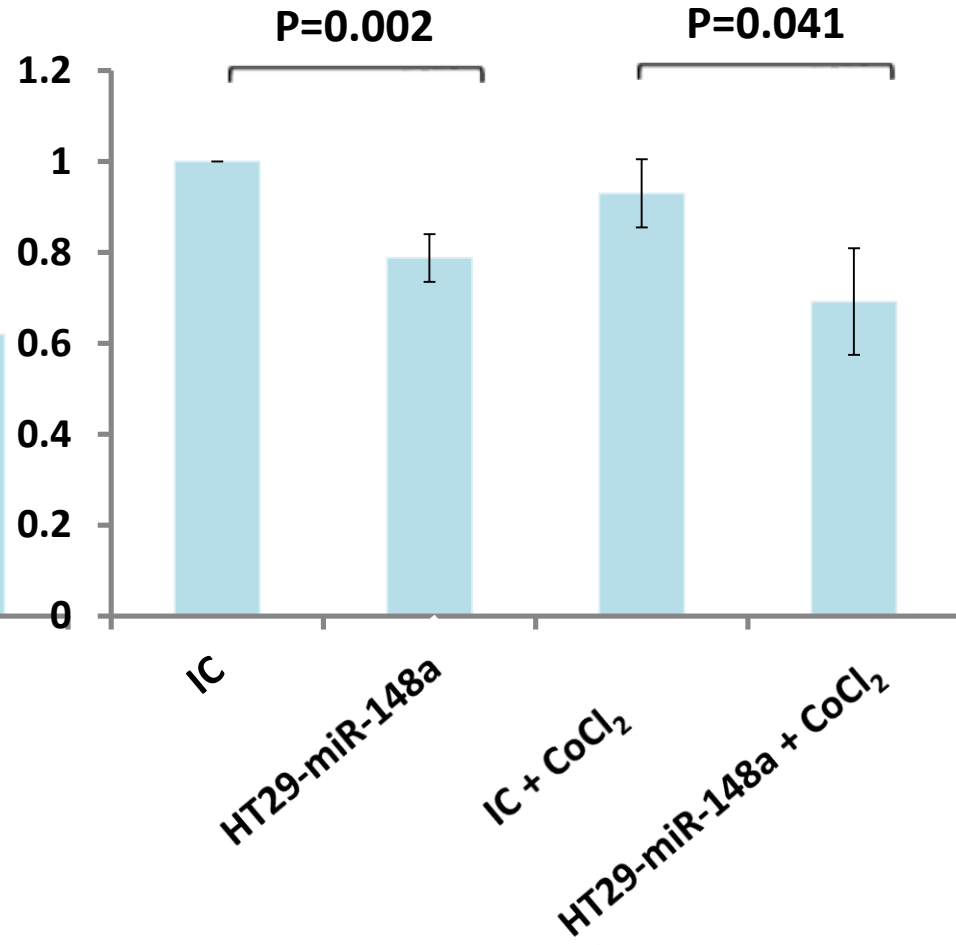

# Supplementary Figure 4

## HUVEC tube formation assay:

**A**

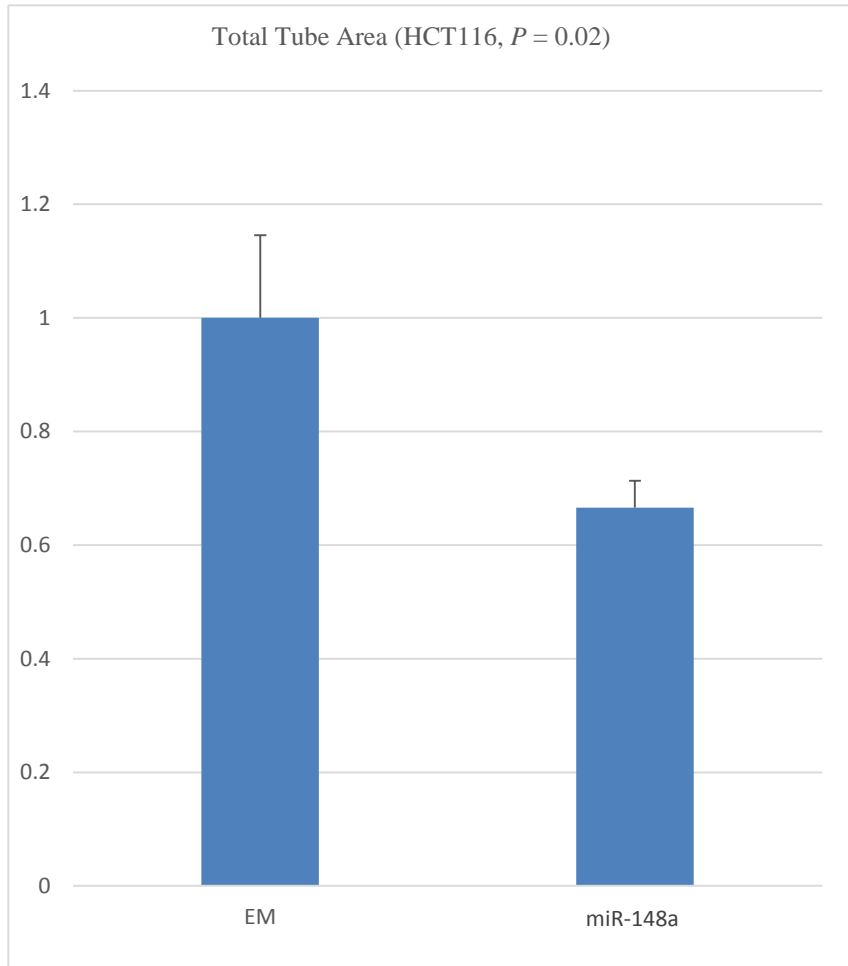

**B**

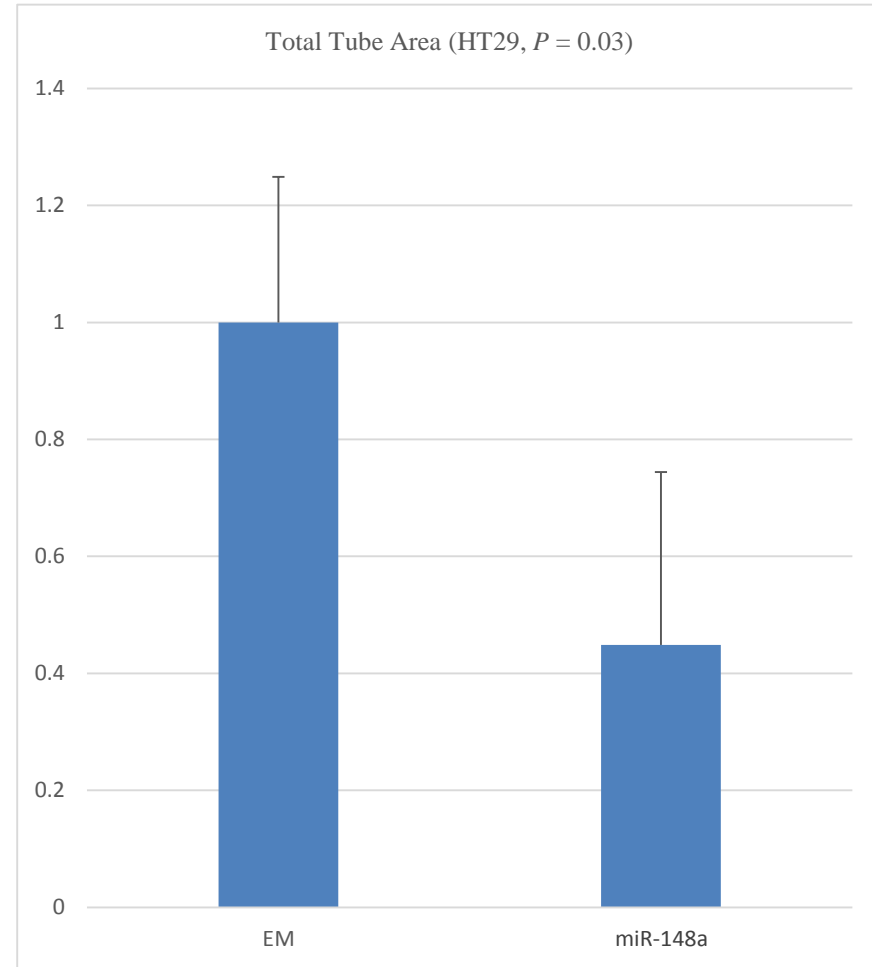



# Supplementary Figure 5

## A HCT116 (Full-length blots/gels )

### HIF-1 $\alpha$

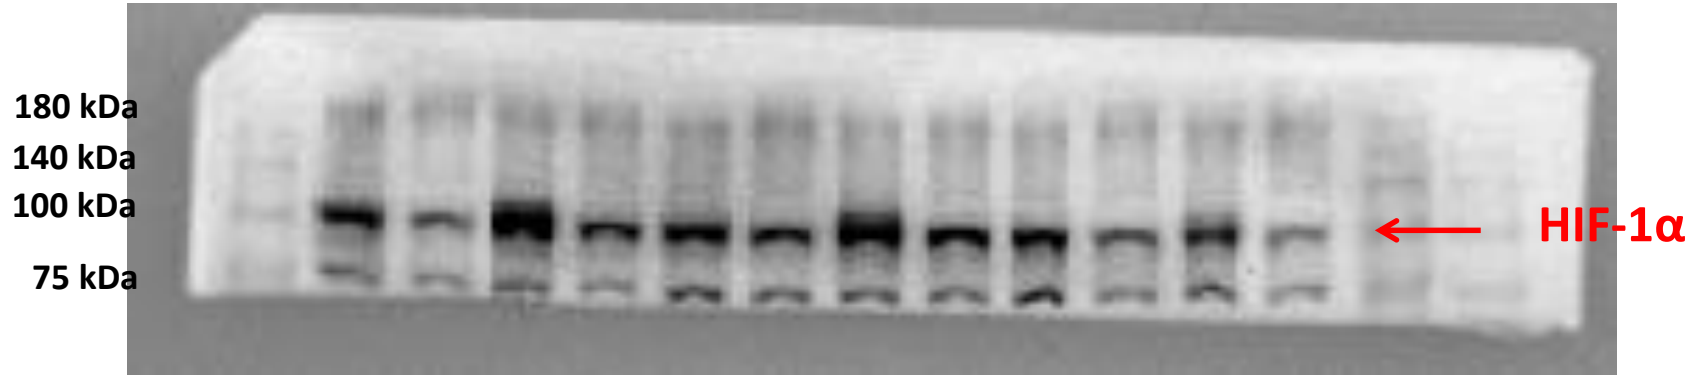

### VEGF

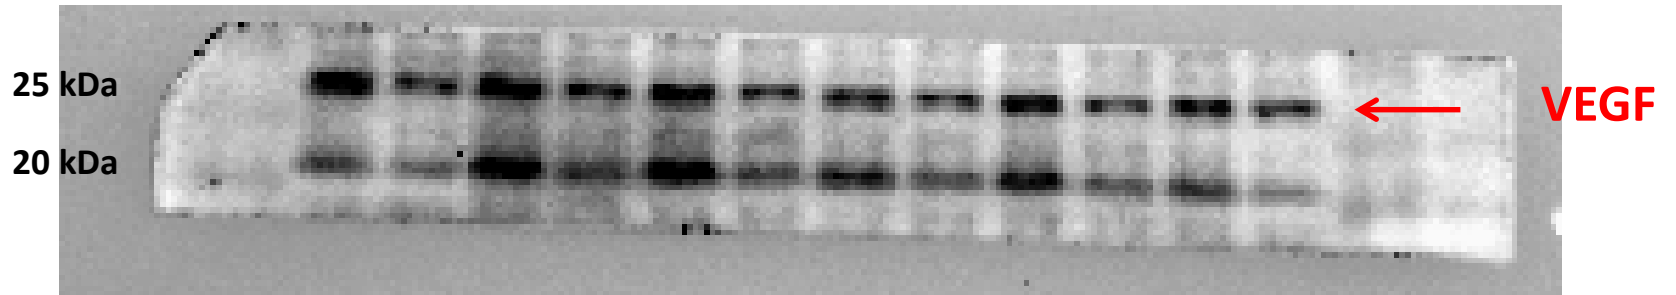

### $\alpha$ -tubulin

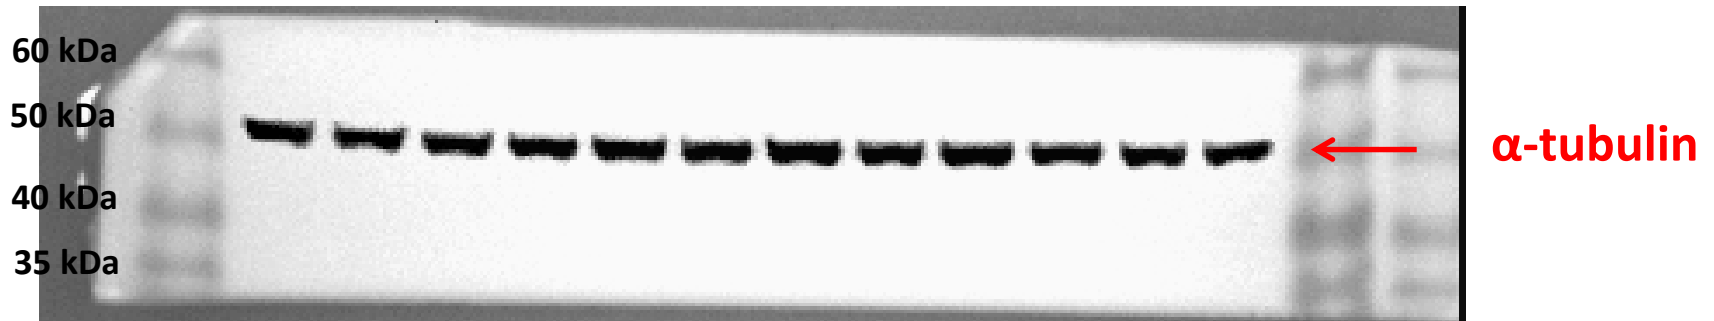

# HCT116 (N=3)

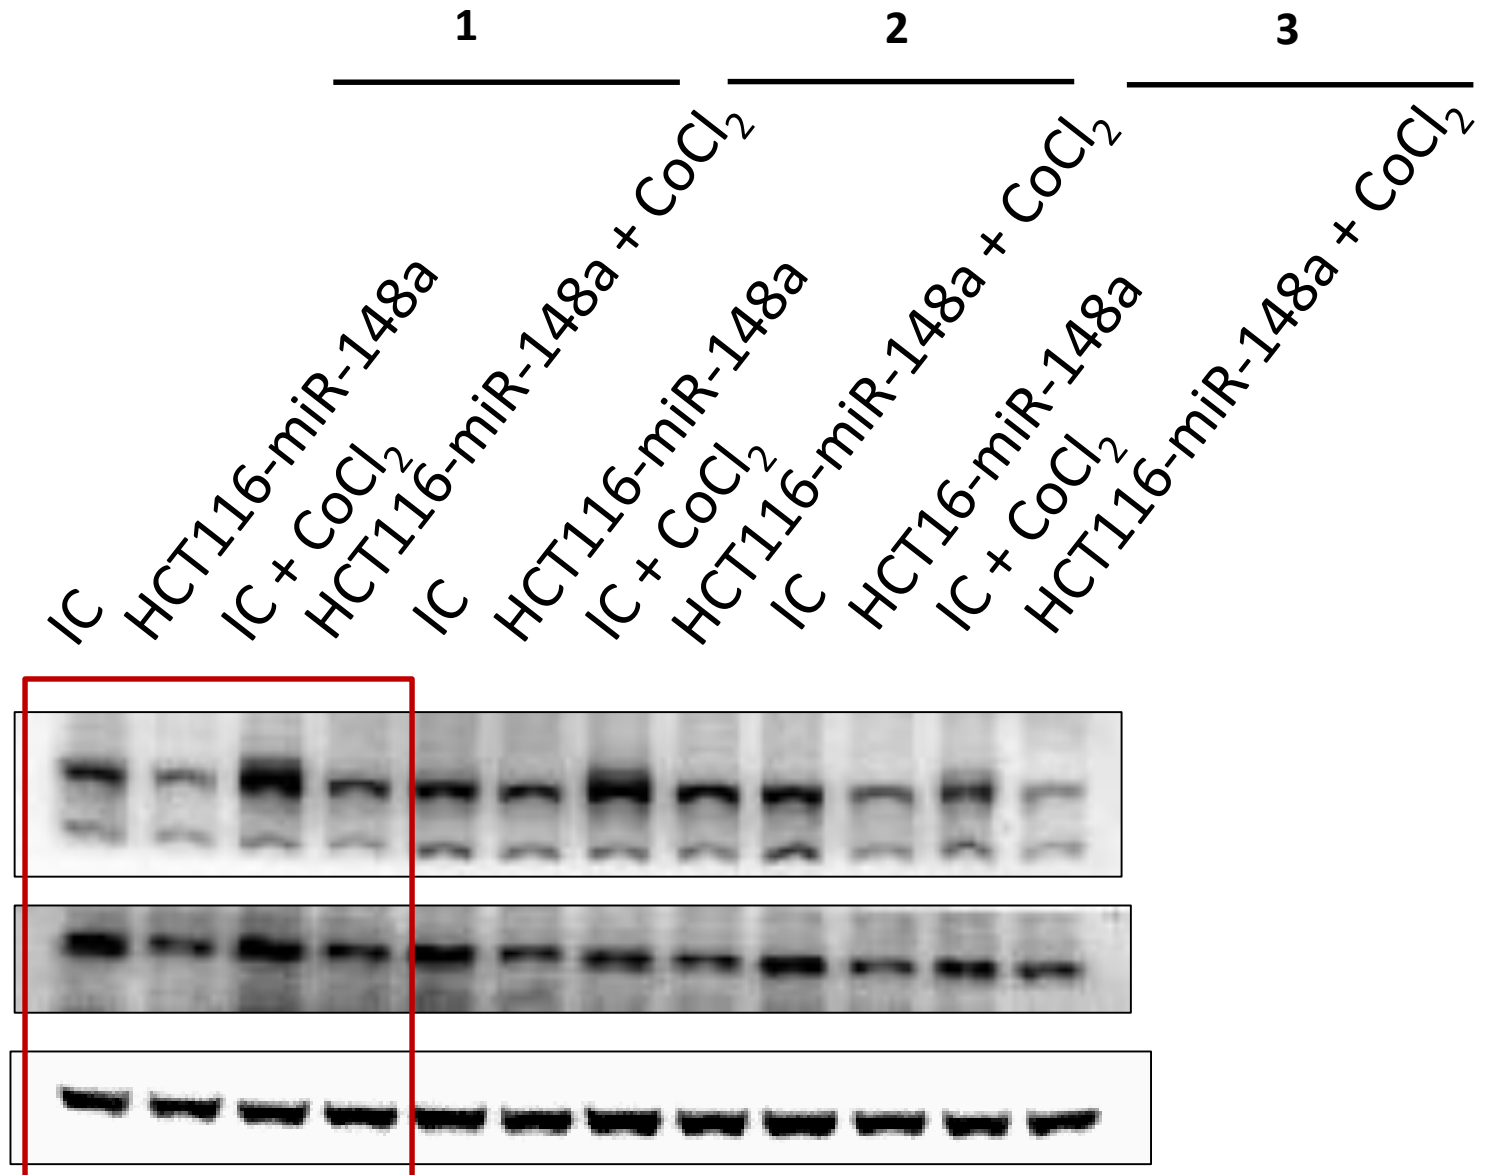

## B HT29 (Full-length blots/gels )

### HIF-1 $\alpha$

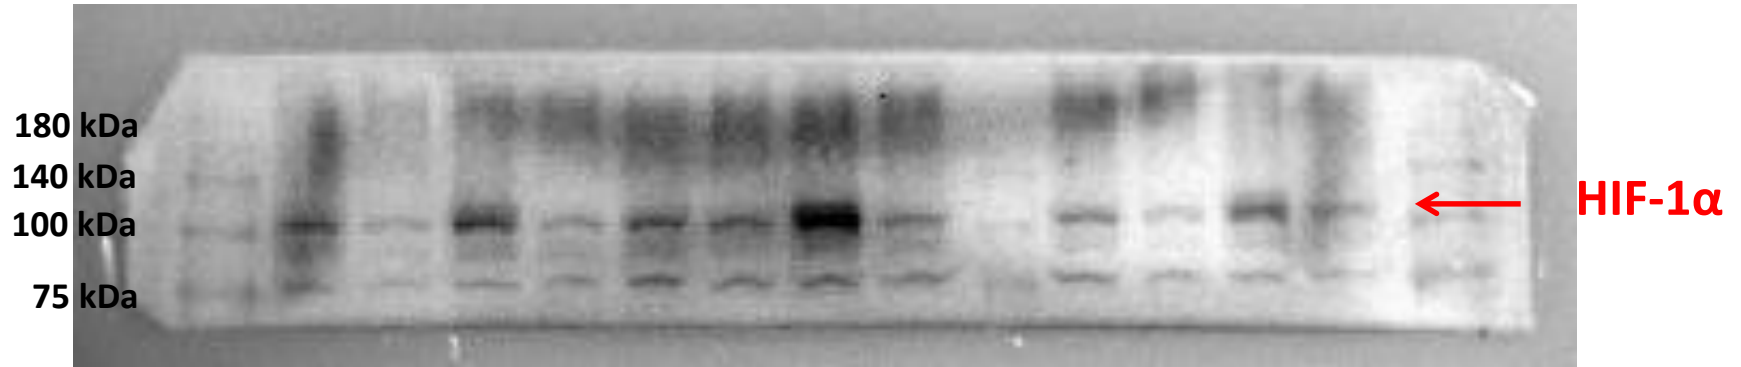

### VEGF

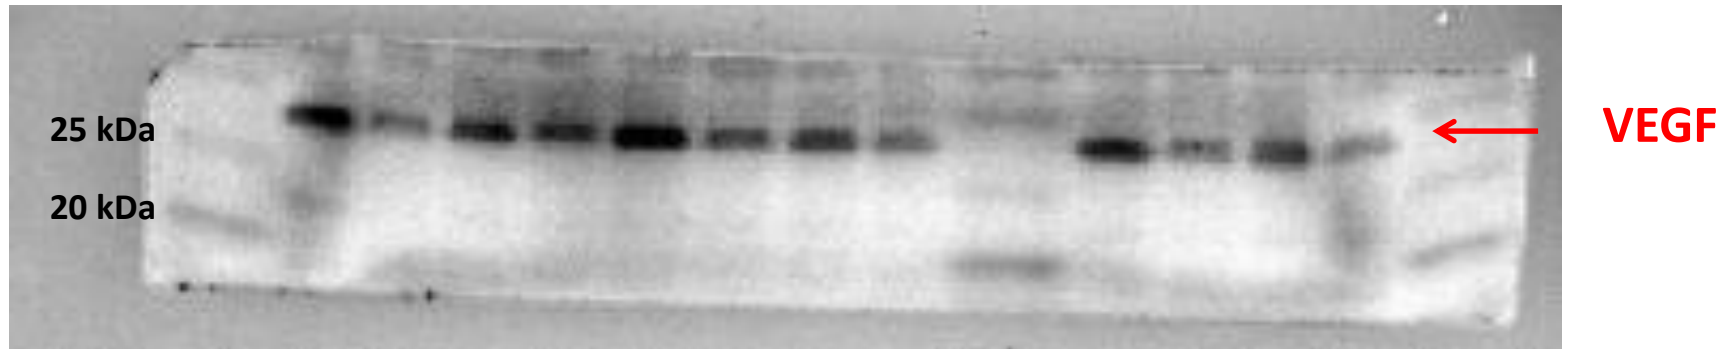

### $\alpha$ -tubulin

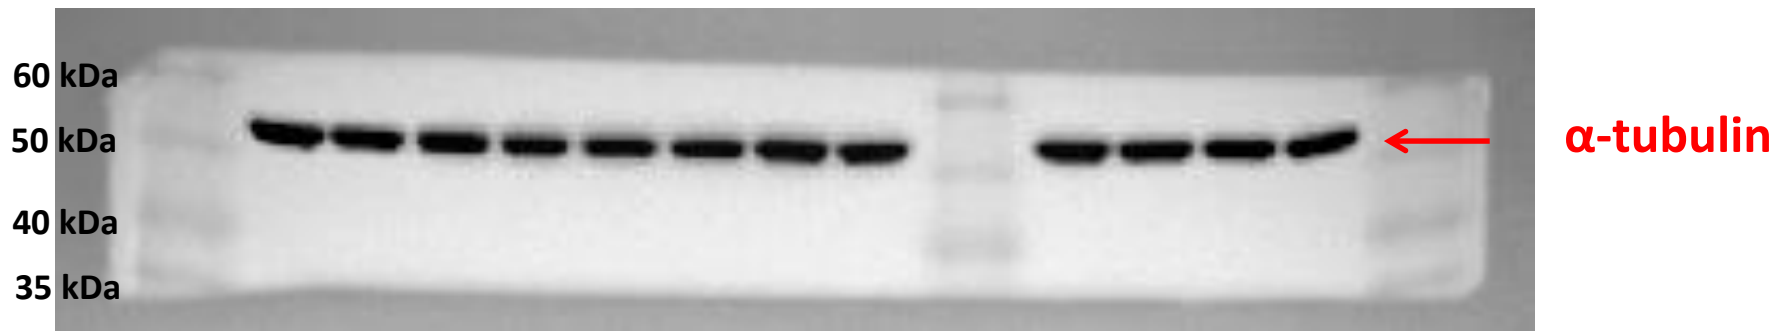

**HT29 (N=3)**

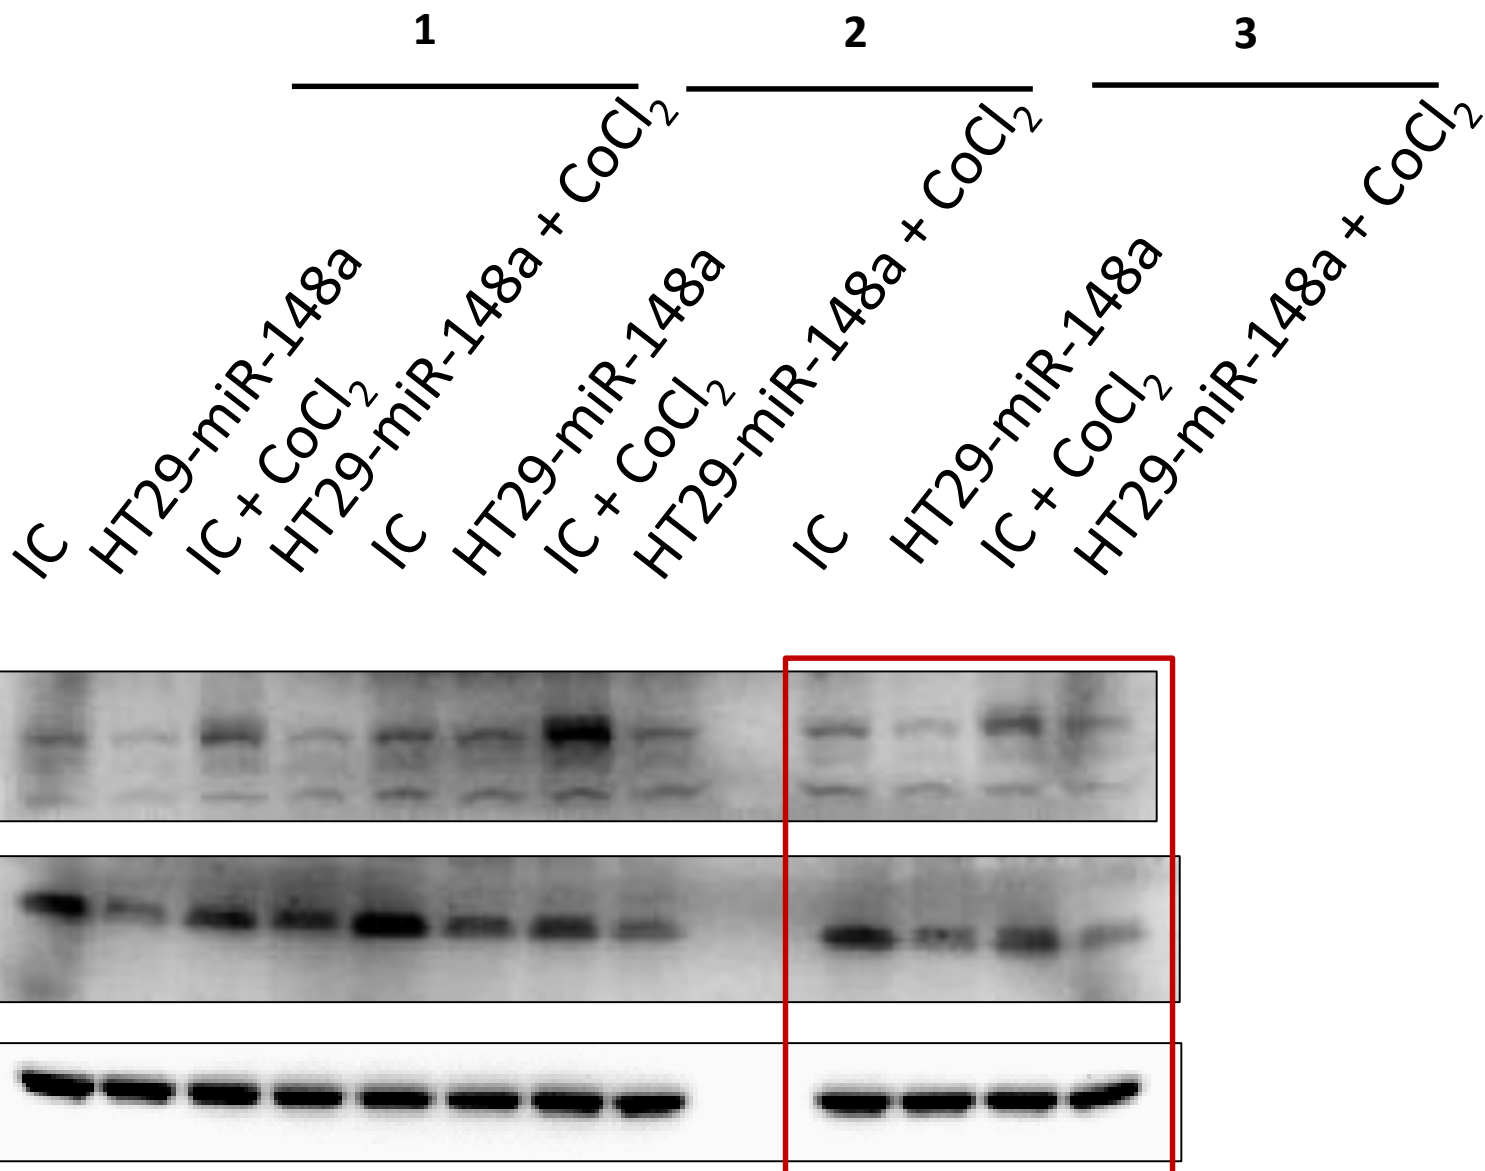

# Supplementary Figure 6

## A HCT116 (N=3)

Animal model :

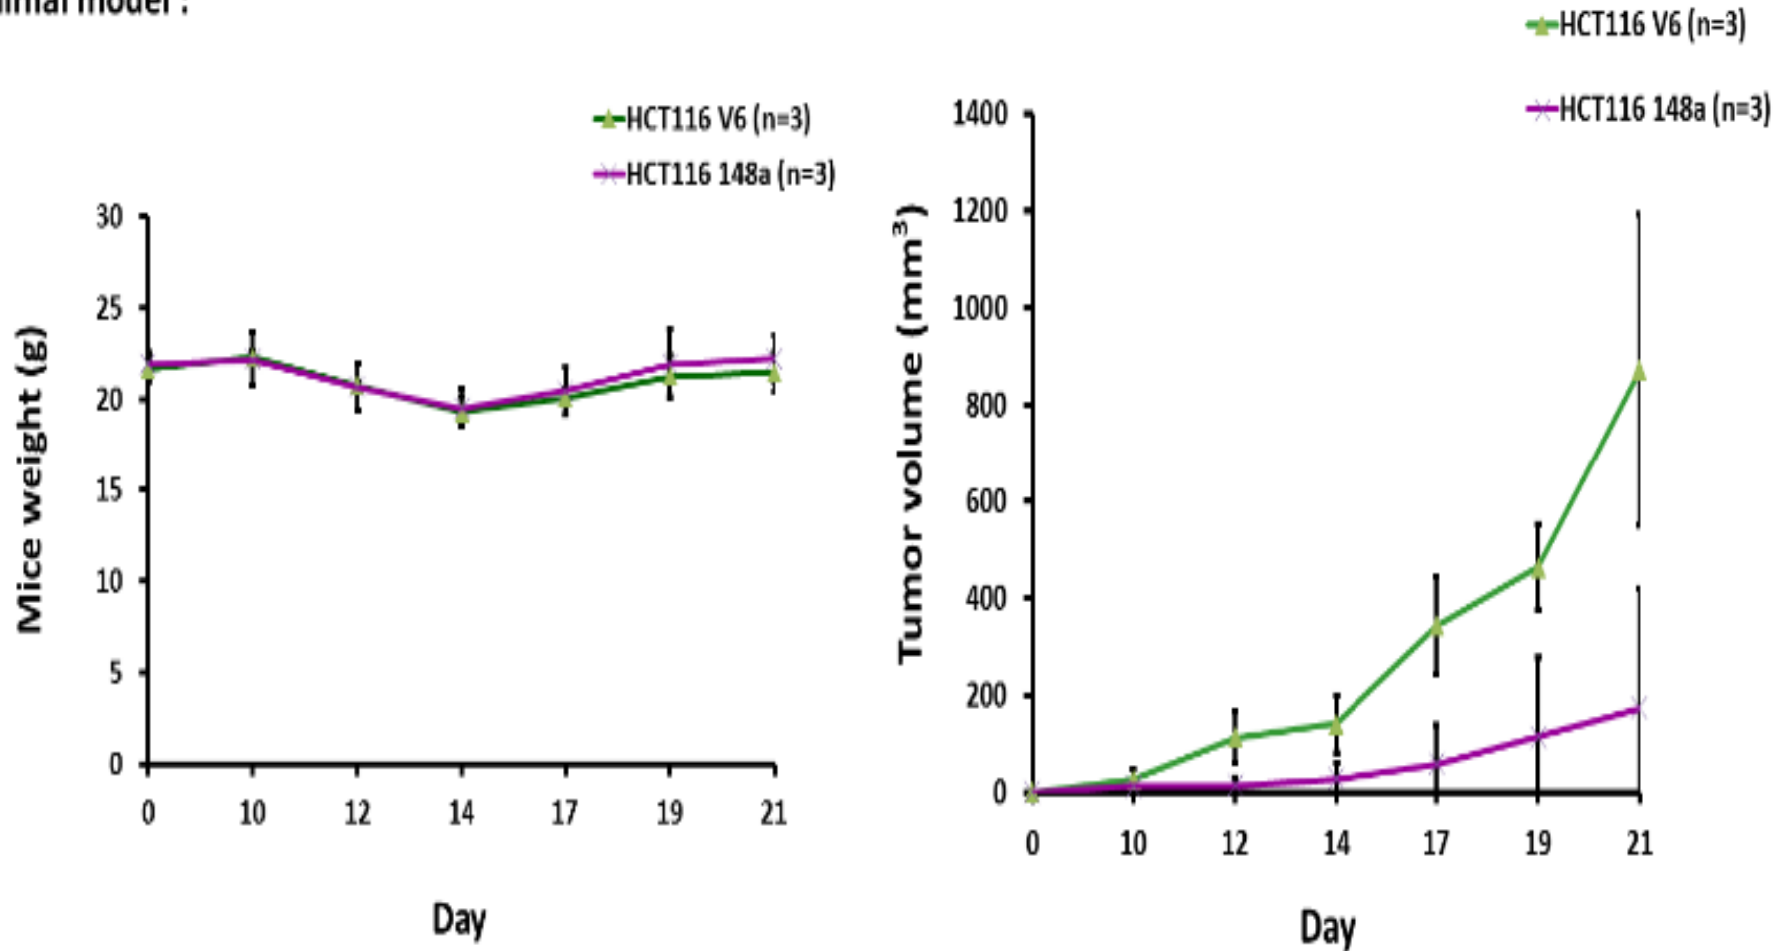

# Tumor burden :

## HCT116 V6

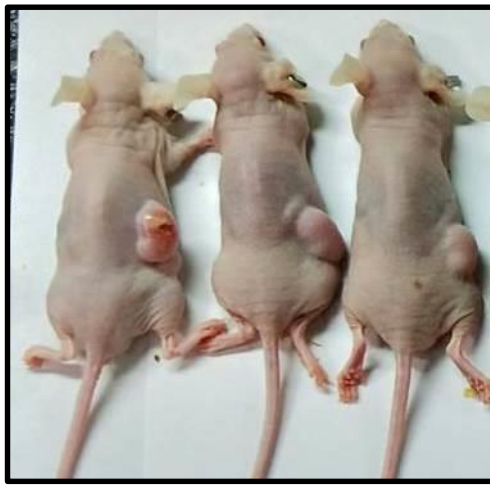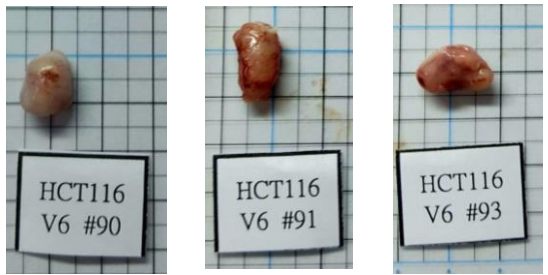

## HCT116 148a

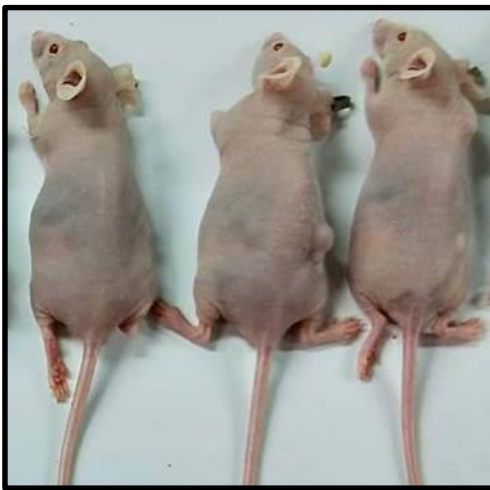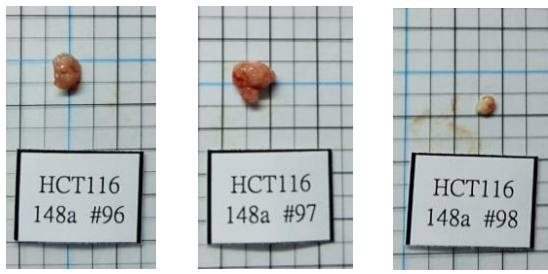

# Tumor lumps were smaller in miR-148a group

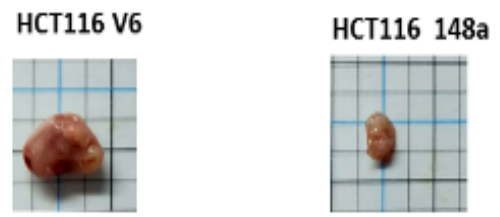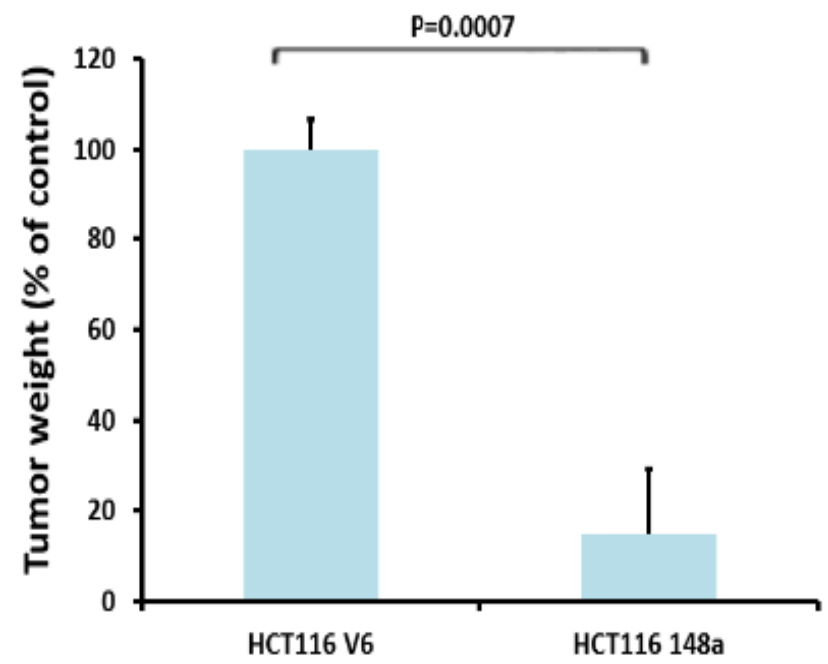

# B HT 29 (N=3)

Animal model : HT29

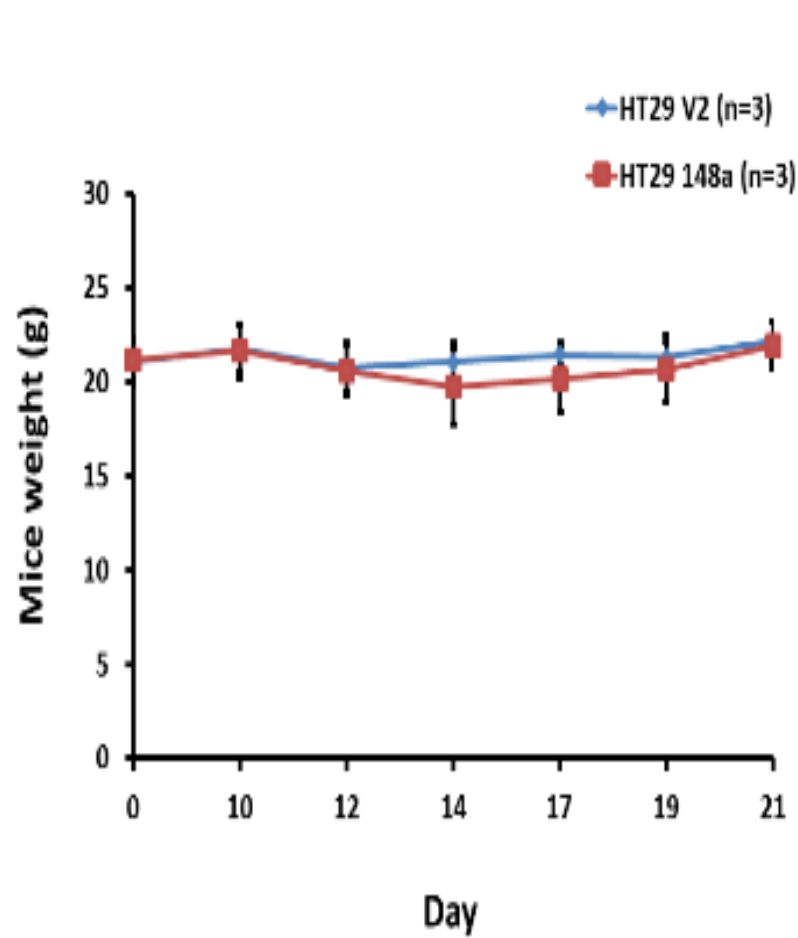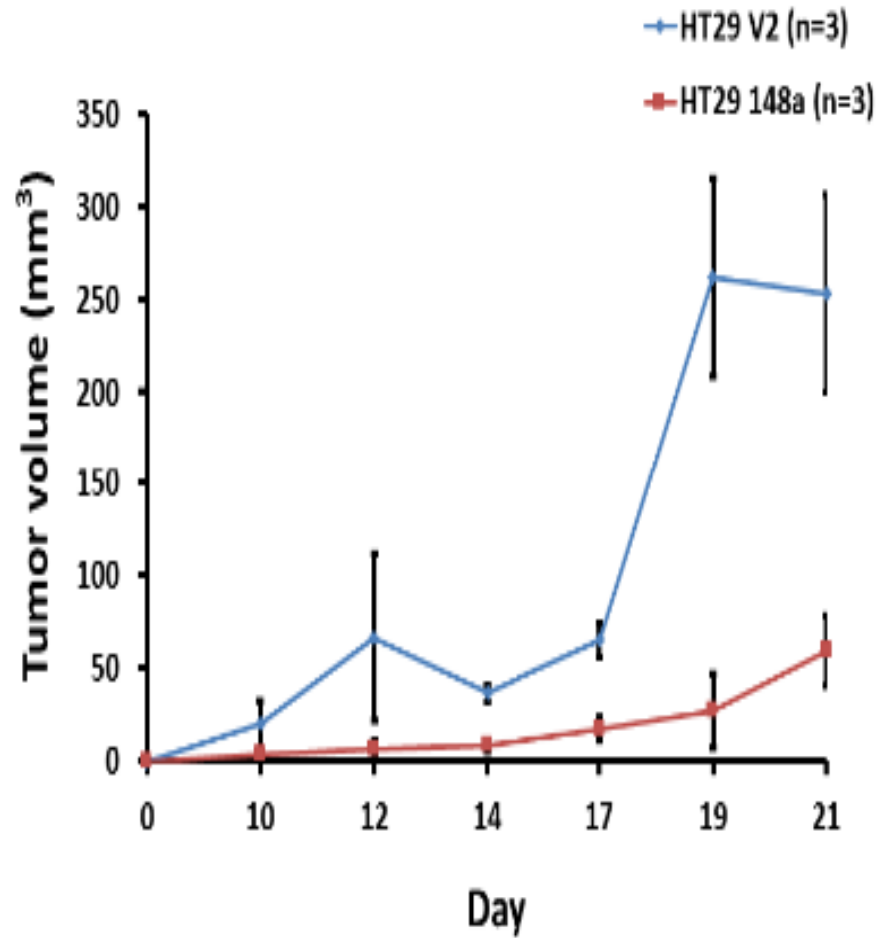

# Tumor burden :

HT29 V2

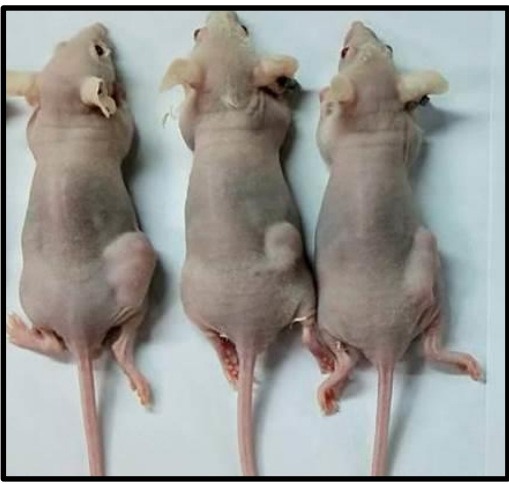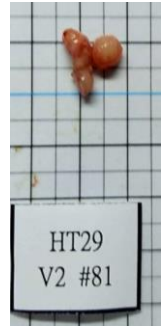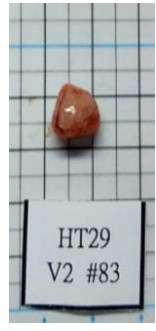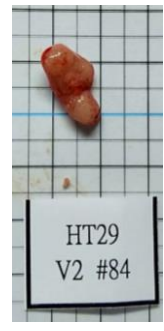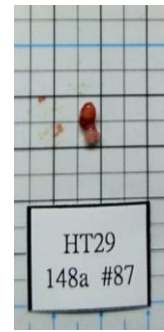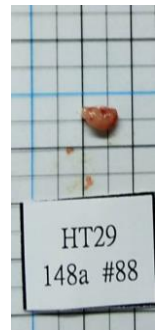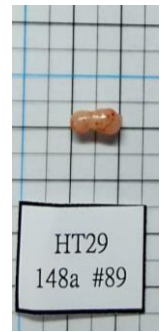

HT29 148a

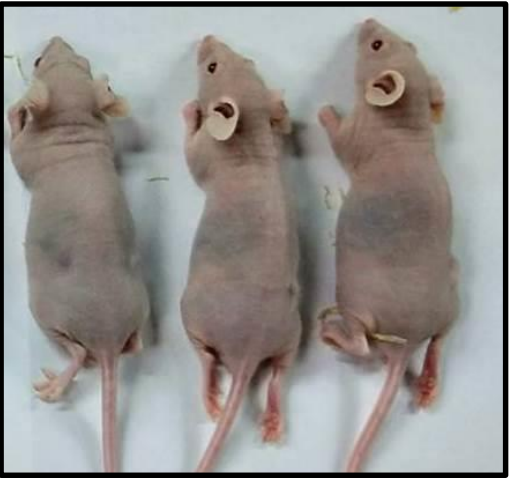

Tumor lumps were smaller in miR-148a group

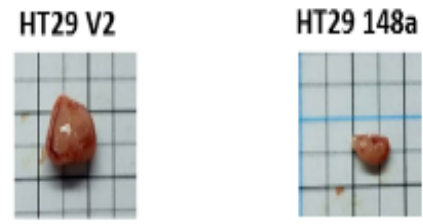

P=0.0037

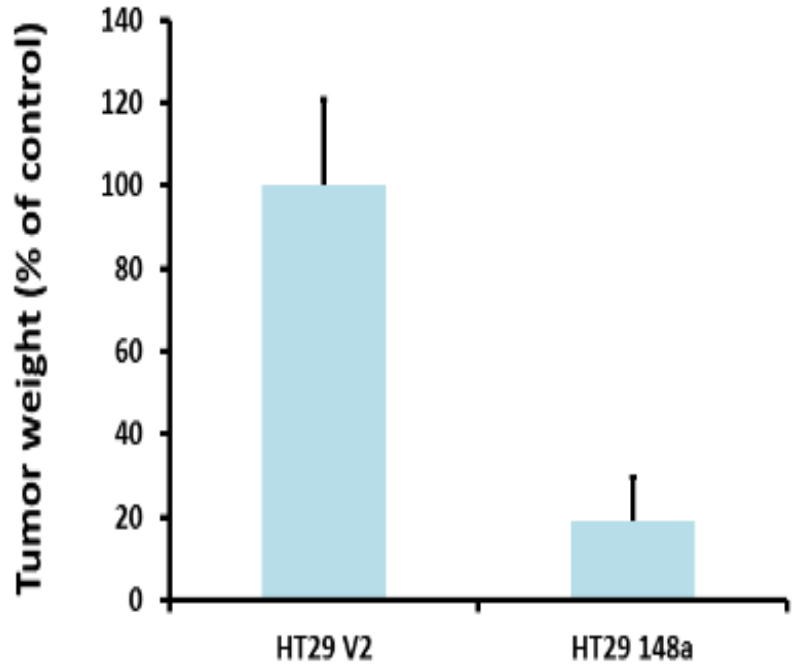

Supplement: JCMM-23-3572-s001.pdf [file JCMM-23-3572-s001.pdf]
